# Supplementary material
Source: Springer Nature journal article supplement (http://www.springermedizin.de/resource/supplementary/12885_2012_3514_MOESM1_ESM.pdf/9463872)
Supplement: MOESM1 [file 9463872]

Patients referred to Dept. of Radiation Oncology meeting inclusion criteria

**Stratification according to modified Mizumoto Score:**

Type of primary tumor

Favourable (Breast, prostate and thyroid cancer (except anaplastic cancer). 0

Unfavorable 3

Karnofsky index  $\leq 70$  3

Visceral metastases 2

Previous chemotherapy 2

Hypercalcemia 2

Multiple bone metastases 1

Elderly ( $\geq 71$  y) 1

**Arm A: 0-4 points**

**10# x 3 /4.85**

**Arm B: 5-9 points**

**5# x 4/ 7 Gy**

**Initial assessment:** Pain / Analgesics/ Quality of life

**Treatment:**

**Imaging:** CT and MRI T1 +/- contrast &T2; slice thickness max. 2mm

**Target volume definition:** Anatomical definition of PTV-boost as involved parts of vertebrae; PTV-elective as whole vertebrae

**Treatment planning:** VMAT > step-and-shoot IMRT

**Treatment delivery:** Daily cone-beam CT based IGRT in six degrees of freedom

**Follow-up:** Primary endpoint - pain response 3 months after radiosurgery
